# Supplementary material
Source: publisher site journal article supplement (http://static.cambridge.org/content/id/urn:cambridge.org:id:article:S1751731119001071/resource/name/S1751731119001071supp001.docx)
Supplement: Supplementary file 1 [file S1751731119001071supp001.docx]

***animal*: The effect of calf jacket usage on performance, behaviour and physiological responses of group housed dairy calves**

G. Scoley, A. Gordonand S.J. Morrison

*Statistical analysis*

**Supplementary Equation S1** Mathematical equation for the repeated measures residual maximum likelihood estimation (REML) model, using daily intake of milk replacer as an example

where the elements of C are defined as follows:

**Supplementary Equation S2** Mathematical equation for generalised linear mixed model (GLMM) used in analysis of number of visits to the milk feeder
